# Supplementary material for: Molecular mechanism of active Cas7-11 in processing CRISPR RNA and interfering target RNA
Source: eLife journal article supplement (doi:10.7554/elife.81678), 2022-10-03
Supplement: supp [file elife-81678-supp-v1.zip]

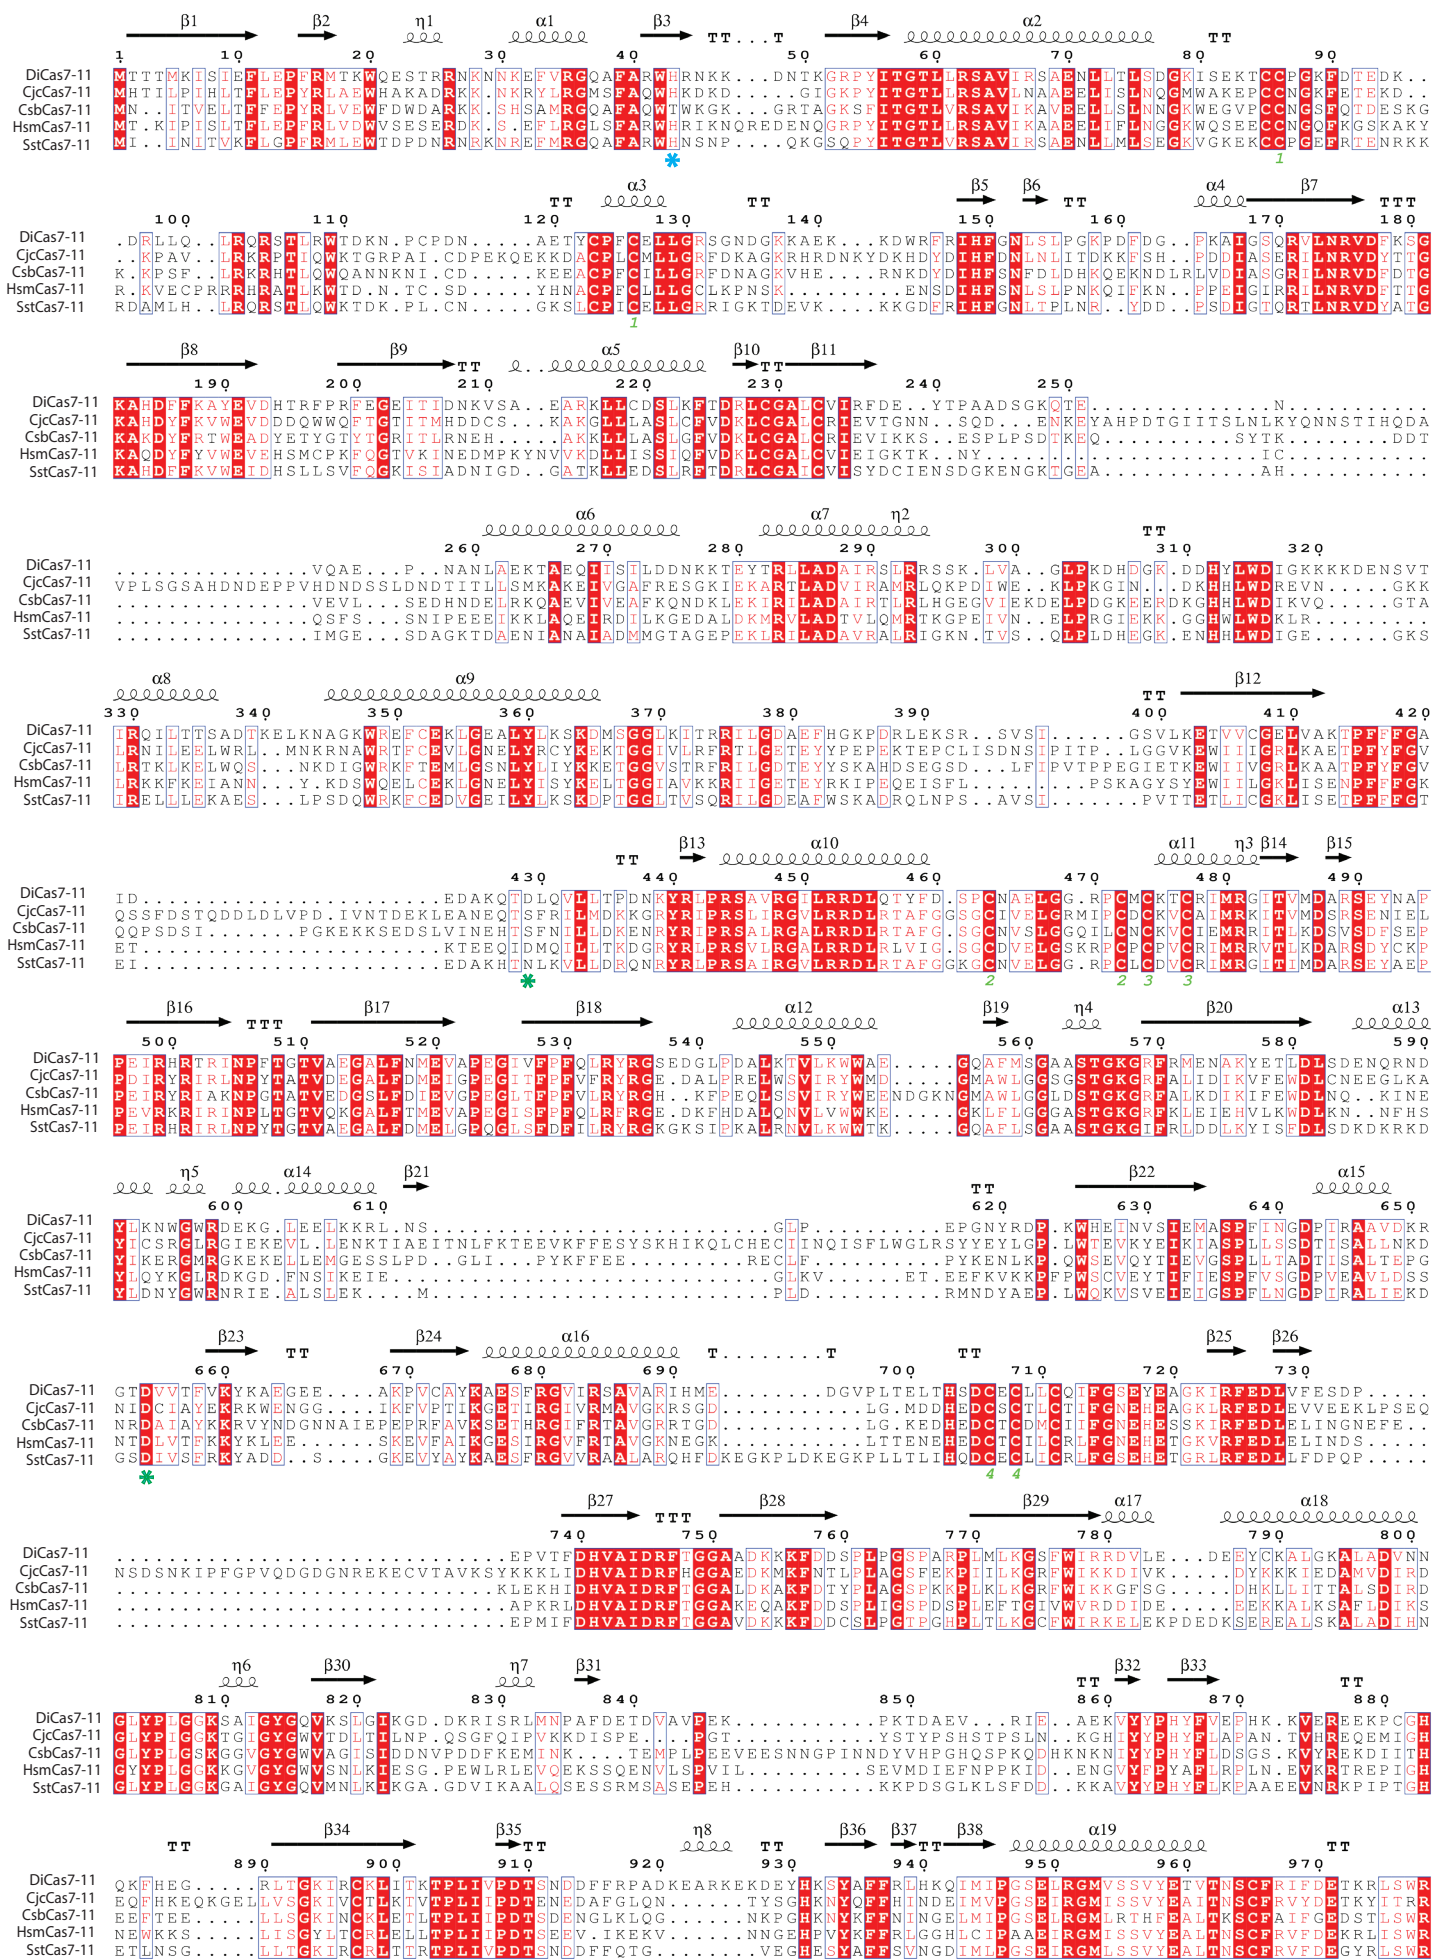

D1Cas7-11 KPKSLPSVKSI GKVKWFDEGKGFGILIMDDGKEVSI SKNSIRGNILLKKGQKVTFHFIVQGLIPKAEDIEIAK  
 CjCas7-11 . KIERDGMKV .  
 CsbCas7-11 . VQRDKS .  
 HsmCas7-11 . . . . . K  
 SstCas7-11 . . . . .
